# Supplementary material
Source: PubMed Central journal article supplement (PMC6142968)
Supplement: jamainternmed-178-1190-s001.pdf [file jamainternmed-178-1190-s001.pdf]

## Supplementary Online Content

Chang H-Y, Singh S, Mansour O, Baksh S, Alexander GC. Association between sodium-glucose cotransporter 2 inhibitors and lower extremity amputation among patients with type 2 diabetes. *JAMA Intern Med*. Published online August 13, 2018. doi:10.1001/jamainternmed.2018.3034

**eAppendix 1.** Outcomes

**eAppendix 2.** Control Variable – Comorbidities

**eTable 1.** Distribution of Reasons for Exiting the Cohort

**eTable 2.** Diabetes Medications – Main Exposure

**eTable 3.** Insulin And Control Variable – Medications

**eTable 4.** Standardized Differences (SD) - First Cohort / Before Propensity Score Weighting

**eTable 5.** Standardized Differences (SD) - First Cohort / After Propensity Score Weighting

**eTable 6.** Standardized Differences (SD) – Second Cohort / Before Propensity Score Weighting

**eTable 7.** Standardized Differences (SD) - Second Cohort / After Propensity Score Weighting

**eTable 8.** Variables With the Proportional Hazard Assumption Violation for Each Outcome and the Comparison Drug (Relative to SGLT-2)

**eTable 9.** Characteristics of the Study Sample - the Second Cohort

**eTable 10.** Adjusted Association Between SGLT2 Use, Amputation and Other Vascular Outcomes – Different Methods of Control Variables Inclusion (Regression Covariates With and Without ATT Weighting)

**eTable 11.** Adjusted Association Between SGLT2 Use, Amputation and Other Vascular Outcomes After Combining DPP4 Inhibitors and GLP1 Agonists as Single Reference Group

**eTable 12.** Adjusted Association Between SGLT2 Use, Amputation and Other Vascular Outcomes Accounting for Use of Sulfonylureas, Metformin and TZDs During Baseline Period

**eTable 13.** Adjusted Association Between SGLT2 Use and Amputation – Including Patients With Amputation in The Baseline

This supplementary material has been provided by the authors to give readers additional information about their work.

## **eAppendix 1. Outcomes**

### **Ulcer:**

#### Definition

ICD-9-CM:

707.1x

#### Performance Measure

Sensitivity: 74.2

Specificity: 98.3

Predictive Positive Value: 88.5

#### Source

Newton KM, Wagner EH, Ramsey SD, McCulloch D, Evans R, Sandhu N, Davis C. The use of automated data to identify complications and comorbidities of diabetes: a validation study. J Clin Epidemiol. 1999;52(3):199–207.

### **Osteomyelitis**

#### Definition

ICD-9-CM:

730.xx

#### Performance Measure

Sensitivity: 82.1

Specificity: 96.9

Predictive Positive Value: 63.9

#### Source

Newton KM, Wagner EH, Ramsey SD, McCulloch D, Evans R, Sandhu N, Davis C. The use of automated data to identify complications and comorbidities of diabetes: a validation study. J Clin Epidemiol. 1999;52(3):199–207.

### **Amputation**

#### Definition

ICD-9-CM procedure code:

84.11

84.12

84.13

84.14

84.15

84.16

84.17

CPT:

28800

28805

28810

28820

28825

#### Performance Measure

Sensitivity: 94.6

Specificity: 96.8

Predictive Positive Value: 85.4

#### Source

Newton KM, Wagner EH, Ramsey SD, McCulloch D, Evans R, Sandhu N, Davis C. The use of automated data to identify complications and comorbidities of diabetes: a validation study. *J Clin Epidemiol.* 1999;52(3):199–207.

### **Peripheral vascular disease**

#### Definition

ICD-9-CM:

250.7x440.xx441.xx442.3x443.9x444.22443.81785.4x

#### Performance Measure

Sensitivity: 71.8

Specificity: 86.6

Predictive Positive Value: 63.8

#### Source

Newton KM, Wagner EH, Ramsey SD, McCulloch D, Evans R, Sandhu N, Davis C. The use of automated data to identify complications and comorbidities of diabetes: a validation study. *J Clin Epidemiol.* 1999;52(3):199–207.

### **Critical limb ischemia**

#### Definition

ICD-9-CM:

440.22

440.23

440.24

443.9x

#### Performance Measure

Sensitivity: 75

Kappa: 80

#### Source

Bekwelem W, Bengtson LG, Oldenburg NC, Winden TJ, Keo HH, Hirsch AT, Duval S. Development of administrative data algorithms to identify patients with critical limb ischemia. *Vasc Med.* 2014;19:483–490.

## **eAppendix 2. Control Variable – Comorbidities**

### **Macrovascular and Microvascular Disease**

#### Definition

##### *Cerebrovascular Disease*

ICD-9-CM: 430.xx, 431.xx, 432.xx, 433.xx, 434.xx, 435.xx, 436.xx, 437.xx, 438.xx

##### *Congestive Heart Failure*

ICD-9-CM: 426.xx, 427.xx, 428.xx

##### *Ischemic Heart Disease*

ICD-9-CM: 410.xx, 411.xx, 412.xx, 413.xx, 414.xx

##### *Hypertension*

ICD-9-CM: 401.xx, 402.xx, 403.xx, 404.xx, 405.xx

##### *Retinopathy*

ICD-9-CM: 362.xx, 250.5x, 379.23

##### *Nephropathy*

ICD-9-CM: 581.xx, 585.xx, 586.xx

##### *Neuropathy*

ICD-9-CM: 337.xx, 357.xx

#### Source

Erkens JA, Klungel OH, Stolk RP, Spoelstra JA, Grobbee DE, Leufkens HG. Antihypertensive drug therapy and the risk of lower extremity amputations in pharmacologically treated type 2 diabetes patients. *Pharmacoepidemiol Drug Safety*. 2004;13(3):139–46

### **Atrial fibrillation**

#### Definition

ICD-9-CM: 427.31 / First or Second position

#### Source

Abraham NS, Singh S, Alexander GC, et al. Comparative risk of gastrointestinal bleeding with dabigatran, rivaroxaban, and warfarin: population based cohort study. *BMJ*. 2015;350:h1857.

### **Renal Disease**

#### Definition

CPT: 90935-90999

ICD-9-CM: 584.xx, 585.xx, 586.xx

ICD-9-CM procedure code: 55.6

#### Source

Newton KM, Wagner EH, Ramsey SD, McCulloch D, Evans R, Sandhu N, Davis C. The use of automated data to identify complications and comorbidities of diabetes: a validation study. *J Clin Epidemiol*. 1999;52(3):199–207.

### **Eye Disease**

#### Definition

ICD-9-CM: 361.9x, 362.01, 362.02, 362.8x, 379.23

ICD-9-CM procedure code: 14.7

#### Source

Newton KM, Wagner EH, Ramsey SD, McCulloch D, Evans R, Sandhu N, Davis C. The use of automated data to identify complications and comorbidities of diabetes: a validation study. *J Clin Epidemiol*. 1999;52(3):199–207.

**eTable 1.** Distribution of Reasons for Exiting the Cohort

| Type of medication                     | SGLT2            | DPP4             | GLP1             | Other <sup>1</sup> |
|----------------------------------------|------------------|------------------|------------------|--------------------|
| <b><i>Amputation**</i></b>             |                  |                  |                  |                    |
| Loss of medical or pharmacy enrollment | 5,931<br>14.88%  | 18,949<br>18.04% | 5,563<br>14.22%  | 184,079<br>23.91%  |
| Hospitalization                        | 1,091<br>2.74%   | 3,499<br>3.33%   | 1,073<br>2.74%   | 41,503<br>5.39%    |
| Loss of continuous drug at hand        | 13,801<br>34.62% | 48,362<br>46.05% | 20,243<br>51.75% | 416,664<br>54.12%  |
| Addition of other newer agents         | 4,055<br>10.17%  | 7,823<br>7.45%   | 2,566<br>6.56%   | 0<br>0.00%         |
| Study end: Sep 30, 2015                | 14,973<br>37.56% | 26,349<br>25.09% | 9,664<br>24.70%  | 127,417<br>16.55%  |
| Uncensored outcome                     | 18<br>0.05%      | 41<br>0.04%      | 11<br>0.03%      | 231<br>0.03%       |
| <b><i>Ulcer**</i></b>                  |                  |                  |                  |                    |
| Loss of medical or pharmacy enrollment | 5,720<br>14.78%  | 18,200<br>17.95% | 5,357<br>14.12%  | 179,229<br>23.74%  |
| Hospitalization                        | 1,007<br>2.60%   | 3,187<br>3.14%   | 986<br>2.60%     | 39,574<br>5.24%    |
| Loss of continuous drug at hand        | 13,392<br>34.61% | 46,707<br>46.06% | 19,634<br>51.76% | 409,023<br>54.17%  |
| Addition of other newer agents         | 3,895<br>10.07%  | 7,548<br>7.44%   | 2,461<br>6.49%   | 0<br>0.00%         |
| Study end: Sep 30, 2015                | 14,553<br>37.61% | 25,435<br>25.08% | 9,384<br>24.74%  | 124,808<br>16.53%  |
| Uncensored outcome                     | 125<br>0.32%     | 331<br>0.33%     | 110<br>0.29%     | 2,407<br>0.32%     |
| <b><i>Osteomyelitis**</i></b>          |                  |                  |                  |                    |
| Loss of medical or pharmacy enrollment | 5,734<br>14.82%  | 18,240<br>17.99% | 5,374<br>14.17%  | 179,710<br>23.80%  |
| Hospitalization                        | 1,011<br>2.61%   | 3,209<br>3.16%   | 1,001<br>2.64%   | 39,728<br>5.26%    |
| Loss of continuous drug at hand        | 13,413<br>34.67% | 46,792<br>46.14% | 19,671<br>51.86% | 409,625<br>54.25%  |
| Addition of other newer agents         | 3,905<br>10.09%  | 7,568<br>7.46%   | 2,466<br>6.50%   | 0<br>0.00%         |
| Study end: Sep 30, 2015                | 14,592<br>37.7%  | 25,523<br>25.17% | 9,400<br>24.78%  | 125,288<br>16.59%  |

|                                             |                  |                  |                  |                   |
|---------------------------------------------|------------------|------------------|------------------|-------------------|
| Uncensored outcome                          | 37<br>0.10%      | 76<br>0.07%      | 20<br>0.05%      | 690<br>0.09%      |
| <b><i>Peripheral Vascular Disease**</i></b> |                  |                  |                  |                   |
| Loss of medical or pharmacy enrollment      | 5,676<br>14.67%  | 17,968<br>17.72% | 5,309<br>14.00%  | 177,037<br>23.45% |
| Hospitalization                             | 969<br>2.50%     | 3,077<br>3.03%   | 952<br>2.51%     | 38,527<br>5.10%   |
| Loss of continuous drug at hand             | 13,274<br>34.31% | 46,100<br>45.46% | 19,454<br>51.29% | 405,593<br>53.72% |
| Addition of other newer agents              | 3,844<br>9.93%   | 7,459<br>7.36%   | 2,433<br>6.41%   | 0<br>0.00%        |
| Study end: Sep 30, 2015                     | 14,384<br>37.18% | 24,960<br>24.61% | 9,275<br>24.45%  | 122,701<br>16.25% |
| Uncensored outcome                          | 545<br>1.41%     | 1,844<br>1.82%   | 509<br>1.34%     | 11,183<br>1.47%   |
| <b><i>Critical Limb Ischemia**</i></b>      |                  |                  |                  |                   |
| Loss of medical or pharmacy enrollment      | 5,715<br>14.77%  | 18,127<br>17.88% | 5,349<br>14.10%  | 178,777<br>23.68% |
| Hospitalization                             | 1,001<br>2.59%   | 3,164<br>3.12%   | 976<br>2.57%     | 39,301<br>5.21%   |
| Loss of continuous drug at hand             | 13,375<br>34.57% | 46,537<br>45.89% | 19,592<br>51.65% | 408,139<br>54.06% |
| Addition of other newer agents              | 3,877<br>10.02%  | 7,533<br>7.43%   | 2,456<br>6.47%   | 0<br>0.00%        |
| Study end: Sep 30, 2015                     | 14,532<br>37.56% | 25,299<br>24.95% | 9,343<br>24.63%  | 124,303<br>16.46% |
| Uncensored outcome                          | 192<br>0.50%     | 748<br>0.74%     | 216<br>0.57%     | 4,521<br>0.60%    |

<sup>1</sup> Includes any combination of metformin, sulfonylureas and glitazones.

**eTable 2.** Diabetes Medications – Main Exposure

| DM Drug Category | Non-Proprietary Name                                                                                                                                                                                                                                                                               |
|------------------|----------------------------------------------------------------------------------------------------------------------------------------------------------------------------------------------------------------------------------------------------------------------------------------------------|
| SGLT-2           | canagliflozin<br>canagliflozin and metformin hydrochloride<br>dapagliflozin<br>dapagliflozin and metformin hydrochloride<br>empagliflozin<br>empagliflozin and linagliptin<br>empagliflozin and metformin hydrochloride                                                                            |
| DPP-4            | alogliptin<br>alogliptin and metformin hydrochloride<br>alogliptin and pioglitazone<br>empagliflozin and linagliptin<br>linagliptin<br>linagliptin and metformin hydrochloride<br>saxagliptin<br>saxagliptin and metformin hydrochloride<br>sitagliptin<br>sitagliptin and metformin hydrochloride |
| GLP-1            | albiglutide<br>dulaglutide<br>exenatide<br>liraglutide                                                                                                                                                                                                                                             |
| Sulfonylureas    | chlorpropamide<br>glimepiride<br>glipizide<br>glipizide and metformin hydrochloride<br>glipizide ER<br>glyburide<br>glyburide and metformin<br>glyburide and metformin hydrochloride<br>pioglitazone and glimepiride<br>pioglitazone hydrochloride and glimepiride<br>tolazamide<br>tolbutamide    |

|                    |                                                                                                                                                                                                                                                                                                                                                                                                                                                                                                                                                                                                                                       |
|--------------------|---------------------------------------------------------------------------------------------------------------------------------------------------------------------------------------------------------------------------------------------------------------------------------------------------------------------------------------------------------------------------------------------------------------------------------------------------------------------------------------------------------------------------------------------------------------------------------------------------------------------------------------|
| Metformin          | <p>alogliptin and metformin hydrochloride<br/> canagliflozin and metformin hydrochloride<br/> dapagliflozin and metformin hydrochloride<br/> empagliflozin and metformin hydrochloride<br/> glipizide and metformin hydrochloride<br/> glyburide and metformin<br/> glyburide and metformin hydrochloride<br/> linagliptin and metformin hydrochloride<br/> metformin<br/> metformin hydrochloride<br/> metformin hydrochloride ER<br/> pioglitazone and metformin hydrochloride<br/> rosiglitazone maleate and metformin hydrochloride<br/> saxagliptin and metformin hydrochloride<br/> sitagliptin and metformin hydrochloride</p> |
| Thiazolidinediones | <p>alogliptin and pioglitazone<br/> pioglitazone and glimepiride<br/> pioglitazone and metformin hydrochloride<br/> pioglitazone hydrochloride and glimepiride<br/> rosiglitazone maleate and metformin hydrochloride</p>                                                                                                                                                                                                                                                                                                                                                                                                             |



**eTable 3.** Insulin And Control Variable – Medications

| Drug Category                        | Non-Proprietary Name                                                                                                                                                                                                                                |
|--------------------------------------|-----------------------------------------------------------------------------------------------------------------------------------------------------------------------------------------------------------------------------------------------------|
| Insulin                              | insulin degludec and liraglutide<br>insulin aspart<br>insulin degludec injection<br>insulin detemir<br>insulin glargine<br>insulin glargine and lixisenatide<br>insulin glulisine<br>insulin human<br>insulin lispro                                |
| ACE inhibitors                       | benazepril<br>captopril<br>enalapril<br>enalaprilat<br>fosinopril<br>lisinopril<br>moexipril<br>perindopril<br>quinapril<br>ramipril<br>trandolapril                                                                                                |
| Anticoagulants                       | apixaban<br>ardeparin<br>argatroban<br>betrixaban<br>bivalirudin<br>dabigatran<br>dalteparin<br>danaparoid<br>desirudin<br>edoxaban<br>enoxaparin<br>fondaparinux<br>heparin<br>heparin flush<br>lepirudin<br>rivaroxaban<br>tinzaparin<br>warfarin |
| Angiotensin receptor blockers (ARBs) | azilsartan<br>azilsartan kamedoxomil<br>candesartan<br>candesartan cilexetil<br>eprosartan<br>olmesartan medoxomil<br>eprosartan mesylate<br>irbesartan<br>losartan                                                                                 |

|                        |                                                                                                                                                                                                                                                                                                                                                                                                                                                                                                                                                                                                                                                                                  |
|------------------------|----------------------------------------------------------------------------------------------------------------------------------------------------------------------------------------------------------------------------------------------------------------------------------------------------------------------------------------------------------------------------------------------------------------------------------------------------------------------------------------------------------------------------------------------------------------------------------------------------------------------------------------------------------------------------------|
|                        | olmesartan medoxomil<br>sacubitril valsartan<br>telmisartan<br>valsartan                                                                                                                                                                                                                                                                                                                                                                                                                                                                                                                                                                                                         |
| Aspirin                | acetylsalicylic acid<br>aspirin                                                                                                                                                                                                                                                                                                                                                                                                                                                                                                                                                                                                                                                  |
| Asthma                 | albuterol<br>aminophylline<br>beclomethasone<br>budesonide<br>budesonide/formoterol<br>ciclesonide<br>cromolyn<br>dexamethasone<br>dyphylline<br>dyphylline/guaifenesin<br>ephedrine<br>epinephrine<br>flunisolide<br>fluticasone<br>fluticasone/salmeterol<br>fluticasone/vilanterol<br>formoterol<br>formoterol/mometasone<br>guaifenesin/theophylline<br>hydrocortisone<br>ipratropium<br>levalbuterol<br>mepolizumab<br>metaproterenol<br>methylprednisolone<br>mometasone<br>montelukast<br>omalizumab<br>prednisolone<br>prednisone<br>racepinephrine<br>reslizumab<br>salmeterol<br>terbutaline<br>theophylline<br>tiotropium<br>triamcinolone<br>zafirlukast<br>zileuton |
| Bile acid sequestrants | cholestyramine<br>colesevelam<br>colestipol                                                                                                                                                                                                                                                                                                                                                                                                                                                                                                                                                                                                                                      |
| Carbonic anhydrase     | acetazolamide                                                                                                                                                                                                                                                                                                                                                                                                                                                                                                                                                                                                                                                                    |

|                                  |                                                                                                                                                                                       |
|----------------------------------|---------------------------------------------------------------------------------------------------------------------------------------------------------------------------------------|
| inhibitors                       | dichlorphenamide<br>methazolamide                                                                                                                                                     |
| Cardioselective beta blocker     | acebutolol<br>atenolol<br>betaxolol<br>bisoprolol<br>esmolol<br>metoprolol<br>nebivolol                                                                                               |
| Calcium Channel Blockers         | amlodipine<br>clevidipine<br>diltiazem<br>felodipine<br>isradipine<br>nicardipine<br>nifedipine<br>nimodipine<br>nisoldipine<br>verapamil                                             |
| Fibrates                         | clofibrate<br>fenofibrate<br>fenofibric acid<br>gemfibrozil                                                                                                                           |
| Glycoprotein platelet inhibitors | abciximab<br>eptifibatide<br>tirofiban                                                                                                                                                |
| Hormone Replacement Therapy      | conjugated estrogen<br>estradiol<br>estradiol/norethisterone acetate<br>estrogen<br>medroxyprogesterone acetate<br>norethisterone acetate<br>testosterone<br>testosterone undecanoate |
| Loop diuretic                    | bumetanide<br>ethacrynic acid<br>furosemide<br>torsemide                                                                                                                              |
| Niacin                           | niacin<br>nicotinic acid                                                                                                                                                              |
| Beta blocker                     | carvedilol<br>labetalol<br>nadolol<br>nebivolol<br>penbutolol<br>pindolol<br>propranolol<br>sotalol<br>timolol                                                                        |

|                                 |                                                                                                                                                                                                                                          |
|---------------------------------|------------------------------------------------------------------------------------------------------------------------------------------------------------------------------------------------------------------------------------------|
| Platelet aggregation inhibitors | aspirin<br>aspirin/dipyridamole<br>aspirin/omeprazole<br>cangrelor<br>cilostazol<br>clopidogrel<br>dipyridamole<br>prasugrel<br>ticagrelor<br>ticlopidine                                                                                |
| Potassium sparing diuretic      | amiloride<br>eplerenone<br>spironolactone<br>triamterene                                                                                                                                                                                 |
| Statin                          | atorvastatin<br>fluvastatin<br>lovastatin<br>pitavastatin<br>pravastatin<br>red yeast rice<br>rosuvastatin<br>simvastatin                                                                                                                |
| Thiazide                        | bendroflumethiazide<br>chlorthalidone<br>eprosartan mesylate hydrochlorothiazide<br>hydrochlorothiazide<br>indapamide<br>irbesartan hydrochlorothiazide<br>methyclothiazide<br>metolazone<br>telmisartan hydrochlorothiazide<br>thiazide |

**eTable 4.** Standardized Differences (SD) - First Cohort / Before Propensity Score Weighting

| Type of Drugs                                     | SGLT-2 | DPP-4  | SD            | SGLT-2 | GLP-1  | SD            | SGLT-2 | Other  | SD            |
|---------------------------------------------------|--------|--------|---------------|--------|--------|---------------|--------|--------|---------------|
| <b>Demographics</b>                               |        |        |               |        |        |               |        |        |               |
| Female, %                                         | 47.26% | 43.34% | <b>-0.079</b> | 47.26% | 60.95% | <b>0.277</b>  | 47.26% | 55.57% | <b>0.167</b>  |
| Mean age, years                                   | 53.54  | 54.54  | <b>0.118</b>  | 53.54  | 51.87  | <b>-0.184</b> | 53.54  | 51.37  | <b>-0.056</b> |
| Age 18 – 34 years, %                              | 2.70%  | 2.26%  | <b>-0.028</b> | 2.70%  | 5.20%  | <b>0.129</b>  | 2.70%  | 10.48% | <b>0.318</b>  |
| Age 35 - 44 years, %                              | 12.64% | 10.71% | <b>-0.060</b> | 12.64% | 16.83% | <b>0.118</b>  | 12.64% | 14.67% | <b>0.059</b>  |
| Age 45 - 54 years, %                              | 32.99% | 30.24% | <b>-0.059</b> | 32.99% | 32.36% | <b>-0.013</b> | 32.99% | 26.30% | <b>-0.147</b> |
| Age 55 - 64 years, %                              | 45.84% | 48.88% | <b>0.061</b>  | 45.84% | 40.37% | <b>-0.111</b> | 45.84% | 41.10% | <b>-0.096</b> |
| Age 65 or older years, %                          | 5.84%  | 7.91%  | <b>0.082</b>  | 5.84%  | 5.24%  | <b>-0.026</b> | 5.84%  | 7.45%  | <b>0.065</b>  |
| <b>Diabetes Severity</b>                          |        |        |               |        |        |               |        |        |               |
| Mean aDCSI score                                  | 0.14   | 0.17   | <b>0.054</b>  | 0.14   | 0.15   | <b>0.011</b>  | 0.14   | 0.10   | <b>-0.141</b> |
| aDCSI 0, %                                        | 89.13% | 88.08% | <b>-0.033</b> | 89.13% | 88.73% | <b>-0.013</b> | 89.13% | 92.69% | <b>0.124</b>  |
| aDCSI 1, %                                        | 8.06%  | 8.01%  | <b>-0.002</b> | 8.06%  | 8.40%  | <b>0.012</b>  | 8.06%  | 5.05%  | <b>-0.122</b> |
| aDCSI 2, %                                        | 2.38%  | 3.16%  | <b>0.048</b>  | 2.38%  | 2.33%  | <b>-0.003</b> | 2.38%  | 1.90%  | <b>-0.033</b> |
| aDCSI 3 or higher, %                              | 0.43%  | 0.76%  | <b>0.042</b>  | 0.43%  | 0.54%  | <b>0.015</b>  | 0.43%  | 0.36%  | <b>-0.012</b> |
| <b>Diagnosis-based Conditions in the baseline</b> |        |        |               |        |        |               |        |        |               |
| Cerebrovascular Disease                           | 1.83%  | 2.32%  | <b>0.034</b>  | 1.83%  | 1.82%  | <b>-0.001</b> | 1.83%  | 1.63%  | <b>-0.016</b> |
| Congestive Heart Failure                          | 4.02%  | 4.91%  | <b>0.043</b>  | 4.02%  | 4.25%  | <b>0.012</b>  | 4.02%  | 3.75%  | <b>-0.014</b> |
| Ischemic Heart Disease                            | 5.79%  | 6.69%  | <b>0.037</b>  | 5.79%  | 5.42%  | <b>-0.016</b> | 5.79%  | 4.47%  | <b>-0.060</b> |
| Hypertension                                      | 59.76% | 55.92% | <b>-0.078</b> | 59.76% | 52.01% | <b>-0.156</b> | 59.76% | 39.69% | <b>-0.410</b> |
| Retinopathy                                       | 4.53%  | 4.92%  | <b>0.019</b>  | 4.53%  | 4.07%  | <b>-0.022</b> | 4.53%  | 2.55%  | <b>-0.107</b> |
| Nephropathy                                       | 1.36%  | 2.93%  | <b>0.109</b>  | 1.36%  | 2.00%  | <b>0.050</b>  | 1.36%  | 1.20%  | <b>-0.014</b> |
| Neuropathy                                        | 2.02%  | 1.86%  | <b>-0.011</b> | 2.02%  | 2.00%  | <b>-0.001</b> | 2.02%  | 0.86%  | <b>-0.097</b> |
| Atrial fibrillation                               | 1.14%  | 1.31%  | <b>0.015</b>  | 1.14%  | 1.15%  | <b>0.001</b>  | 1.14%  | 1.01%  | <b>-0.012</b> |
| Renal Disease                                     | 1.57%  | 3.36%  | <b>0.116</b>  | 1.57%  | 2.21%  | <b>0.047</b>  | 1.57%  | 1.44%  | <b>-0.010</b> |
| Eye Disease                                       | 1.63%  | 1.66%  | <b>0.002</b>  | 1.63%  | 1.38%  | <b>-0.021</b> | 1.63%  | 0.73%  | <b>-0.083</b> |
| <b>Medications in the baseline</b>                |        |        |               |        |        |               |        |        |               |

|                                 |        |        |               |        |        |               |        |        |               |
|---------------------------------|--------|--------|---------------|--------|--------|---------------|--------|--------|---------------|
| ACE inhibitors                  | 37.45% | 36.76% | <b>-0.014</b> | 37.45% | 32.73% | <b>-0.099</b> | 37.45% | 27.31% | <b>-0.218</b> |
| Anticoagulants                  | 1.93%  | 2.15%  | <b>0.016</b>  | 1.93%  | 2.08%  | <b>0.010</b>  | 1.93%  | 1.88%  | <b>-0.004</b> |
| Angiotensin receptor blockers   | 22.85% | 22.19% | <b>-0.016</b> | 22.85% | 21.69% | <b>-0.028</b> | 22.85% | 14.61% | <b>-0.212</b> |
| Aspirin                         | 0.82%  | 0.95%  | <b>0.014</b>  | 0.82%  | 0.65%  | <b>-0.019</b> | 0.82%  | 0.48%  | <b>-0.042</b> |
| Asthma                          | 27.25% | 25.54% | <b>-0.039</b> | 27.25% | 30.59% | <b>0.074</b>  | 27.25% | 26.04% | <b>-0.027</b> |
| Bile Acid Sequestrants          | 1.22%  | 1.07%  | <b>-0.014</b> | 1.22%  | 1.29%  | <b>0.006</b>  | 1.22%  | 0.65%  | <b>-0.059</b> |
| Carbonic Anhydrase Inhibitors   | 0.07%  | 0.07%  | <b>0.002</b>  | 0.07%  | 0.13%  | <b>0.022</b>  | 0.07%  | 0.10%  | <b>0.011</b>  |
| Cardioselective Beta Blockers   | 12.79% | 13.50% | <b>0.021</b>  | 12.79% | 12.13% | <b>-0.020</b> | 12.79% | 11.85% | <b>-0.029</b> |
| Calcium Channel Blockers        | 17.02% | 17.41% | <b>0.010</b>  | 17.02% | 15.07% | <b>-0.053</b> | 17.02% | 13.29% | <b>-0.104</b> |
| Fibrates                        | 9.03%  | 8.92%  | <b>-0.004</b> | 9.03%  | 8.08%  | <b>-0.034</b> | 9.03%  | 5.60%  | <b>-0.132</b> |
| Hormone Replacement Therapy     | 7.97%  | 6.02%  | <b>-0.076</b> | 7.97%  | 11.72% | <b>0.126</b>  | 7.97%  | 9.55%  | <b>0.056</b>  |
| Loop Diuretic                   | 4.10%  | 4.09%  | <b>0.000</b>  | 4.10%  | 5.37%  | <b>0.060</b>  | 4.10%  | 3.20%  | <b>-0.048</b> |
| Niacin                          | 1.27%  | 1.26%  | <b>-0.001</b> | 1.27%  | 1.45%  | <b>0.016</b>  | 1.27%  | 1.50%  | <b>0.020</b>  |
| Beta-blockers                   | 5.29%  | 5.50%  | <b>0.009</b>  | 5.29%  | 5.69%  | <b>0.018</b>  | 5.29%  | 4.37%  | <b>-0.043</b> |
| Platelet Aggregation Inhibitors | 1.46%  | 1.61%  | <b>0.013</b>  | 1.46%  | 1.12%  | <b>-0.030</b> | 1.46%  | 0.86%  | <b>-0.056</b> |
| Potassium Sparing Diuretic      | 4.00%  | 3.88%  | <b>-0.006</b> | 4.00%  | 5.51%  | <b>0.071</b>  | 4.00%  | 4.43%  | <b>0.021</b>  |
| Statin                          | 36.08% | 34.07% | <b>-0.042</b> | 36.08% | 31.49% | <b>-0.097</b> | 36.08% | 21.79% | <b>-0.319</b> |
| Thiazide                        | 36.23% | 35.86% | <b>-0.008</b> | 36.23% | 35.45% | <b>-0.016</b> | 36.23% | 31.33% | <b>-0.104</b> |

**eTable 5.** Standardized Differences (SD) - First Cohort / After Propensity Score Weighting

| Type of Drugs                                     | SGLT-2 | DPP-4  | SD            | SGLT-2 | GLP-1  | SD            | SGLT-2 | Other  | SD            |
|---------------------------------------------------|--------|--------|---------------|--------|--------|---------------|--------|--------|---------------|
| <b>Demographics</b>                               |        |        |               |        |        |               |        |        |               |
| Female, %                                         | 47.26% | 47.26% | <b>0.000</b>  | 47.26% | 47.08% | <b>-0.004</b> | 47.26% | 47.15% | <b>-0.002</b> |
| Mean age, years                                   | 53.54  | 53.53  | <b>-0.001</b> | 53.54  | 53.62  | <b>0.010</b>  | 53.54  | 53.60  | <b>0.002</b>  |
| Age 18 – 34 years, %                              | 2.70%  | 3.15%  | <b>0.027</b>  | 2.70%  | 2.92%  | <b>0.014</b>  | 2.70%  | 6.05%  | <b>0.165</b>  |
| Age 35 - 44 years, %                              | 12.64% | 12.79% | <b>0.004</b>  | 12.64% | 13.10% | <b>0.014</b>  | 12.64% | 11.45% | <b>-0.037</b> |
| Age 45 - 54 years, %                              | 32.99% | 32.02% | <b>-0.021</b> | 32.99% | 31.10% | <b>-0.040</b> | 32.99% | 26.48% | <b>-0.143</b> |
| Age 55 - 64 years, %                              | 45.84% | 45.36% | <b>-0.010</b> | 45.84% | 46.34% | <b>0.010</b>  | 45.84% | 46.96% | <b>0.022</b>  |
| Age 65 or older years, %                          | 5.84%  | 6.69%  | <b>0.035</b>  | 5.84%  | 6.54%  | <b>0.029</b>  | 5.84%  | 9.06%  | <b>0.123</b>  |
| <b>Diabetes Severity</b>                          |        |        |               |        |        |               |        |        |               |
| Mean aDCSI score                                  | 0.14   | 0.14   | <b>-0.001</b> | 0.14   | 0.14   | <b>0.005</b>  | 0.14   | 0.14   | <b>0.007</b>  |
| aDCSI 0, %                                        | 89.13% | 89.35% | <b>0.007</b>  | 89.13% | 88.81% | <b>-0.010</b> | 89.13% | 89.67% | <b>0.017</b>  |
| aDCSI 1, %                                        | 8.06%  | 7.73%  | <b>-0.012</b> | 8.06%  | 8.44%  | <b>0.014</b>  | 8.06%  | 7.13%  | <b>-0.035</b> |
| aDCSI 2, %                                        | 2.38%  | 2.45%  | <b>0.005</b>  | 2.38%  | 2.29%  | <b>-0.006</b> | 2.38%  | 2.61%  | <b>0.015</b>  |
| aDCSI 3 or higher, %                              | 0.43%  | 0.48%  | <b>0.008</b>  | 0.43%  | 0.46%  | <b>0.004</b>  | 0.43%  | 0.59%  | <b>0.023</b>  |
| <b>Diagnosis-based Conditions in the baseline</b> |        |        |               |        |        |               |        |        |               |
| Cerebrovascular Disease                           | 1.83%  | 1.83%  | <b>0.000</b>  | 1.83%  | 1.84%  | <b>0.001</b>  | 1.83%  | 1.84%  | <b>0.001</b>  |
| Congestive Heart Failure                          | 4.02%  | 4.01%  | <b>-0.001</b> | 4.02%  | 4.06%  | <b>0.002</b>  | 4.02%  | 4.04%  | <b>0.001</b>  |
| Ischemic Heart Disease                            | 5.79%  | 5.79%  | <b>0.000</b>  | 5.79%  | 5.81%  | <b>0.001</b>  | 5.79%  | 5.81%  | <b>0.001</b>  |
| Hypertension                                      | 59.76% | 59.78% | <b>0.000</b>  | 59.76% | 60.09% | <b>0.007</b>  | 59.76% | 59.84% | <b>0.002</b>  |
| Retinopathy                                       | 4.53%  | 4.53%  | <b>0.000</b>  | 4.53%  | 4.57%  | <b>0.002</b>  | 4.53%  | 4.56%  | <b>0.002</b>  |
| Nephropathy                                       | 1.36%  | 1.36%  | <b>0.000</b>  | 1.36%  | 1.39%  | <b>0.003</b>  | 1.36%  | 1.37%  | <b>0.001</b>  |
| Neuropathy                                        | 2.02%  | 2.02%  | <b>0.000</b>  | 2.02%  | 2.07%  | <b>0.004</b>  | 2.02%  | 2.04%  | <b>0.002</b>  |
| Atrial fibrillation                               | 1.14%  | 1.14%  | <b>0.000</b>  | 1.14%  | 1.14%  | <b>0.000</b>  | 1.14%  | 1.15%  | <b>0.000</b>  |
| Renal Disease                                     | 1.57%  | 1.56%  | <b>0.000</b>  | 1.57%  | 1.61%  | <b>0.003</b>  | 1.57%  | 1.58%  | <b>0.001</b>  |
| Eye Disease                                       | 1.63%  | 1.62%  | <b>-0.001</b> | 1.63%  | 1.65%  | <b>0.002</b>  | 1.63%  | 1.64%  | <b>0.001</b>  |
| <b>Medications in the baseline</b>                |        |        |               |        |        |               |        |        |               |

|                                 |        |        |               |        |        |               |        |        |               |
|---------------------------------|--------|--------|---------------|--------|--------|---------------|--------|--------|---------------|
| ACE inhibitors                  | 37.45% | 37.49% | <b>0.001</b>  | 37.45% | 37.76% | <b>0.006</b>  | 37.45% | 37.53% | <b>0.002</b>  |
| Anticoagulants                  | 1.93%  | 1.93%  | <b>0.000</b>  | 1.93%  | 1.95%  | <b>0.001</b>  | 1.93%  | 1.94%  | <b>0.001</b>  |
| Angiotensin receptor blockers   | 22.85% | 22.87% | <b>0.001</b>  | 22.85% | 23.00% | <b>0.004</b>  | 22.85% | 22.90% | <b>0.001</b>  |
| Aspirin                         | 0.82%  | 0.82%  | <b>0.000</b>  | 0.82%  | 0.81%  | <b>-0.001</b> | 0.82%  | 0.82%  | <b>0.001</b>  |
| Asthma                          | 27.25% | 27.27% | <b>0.000</b>  | 27.25% | 27.19% | <b>-0.001</b> | 27.25% | 27.30% | <b>0.001</b>  |
| Bile Acid Sequestrants          | 1.22%  | 1.22%  | <b>0.001</b>  | 1.22%  | 1.24%  | <b>0.002</b>  | 1.22%  | 1.23%  | <b>0.001</b>  |
| Carbonic Anhydrase Inhibitors   | 0.07%  | 0.07%  | <b>0.000</b>  | 0.07%  | 0.06%  | <b>0.000</b>  | 0.07%  | 0.07%  | <b>0.001</b>  |
| Cardioselective Beta Blockers   | 12.79% | 12.79% | <b>0.000</b>  | 12.79% | 12.93% | <b>0.004</b>  | 12.79% | 12.81% | <b>0.001</b>  |
| Calcium Channel Blockers        | 17.02% | 17.02% | <b>0.000</b>  | 17.02% | 17.17% | <b>0.004</b>  | 17.02% | 17.02% | <b>0.000</b>  |
| Fibrates                        | 9.03%  | 9.06%  | <b>0.001</b>  | 9.03%  | 9.14%  | <b>0.004</b>  | 9.03%  | 9.09%  | <b>0.002</b>  |
| Hormone Replacement Therapy     | 7.97%  | 8.01%  | <b>0.002</b>  | 7.97%  | 7.98%  | <b>0.001</b>  | 7.97%  | 7.92%  | <b>-0.002</b> |
| Loop Diuretic                   | 4.10%  | 4.06%  | <b>-0.002</b> | 4.10%  | 4.19%  | <b>0.005</b>  | 4.10%  | 4.12%  | <b>0.001</b>  |
| Niacin                          | 1.27%  | 1.27%  | <b>0.000</b>  | 1.27%  | 1.28%  | <b>0.001</b>  | 1.27%  | 1.27%  | <b>0.000</b>  |
| Beta-blockers                   | 5.29%  | 5.28%  | <b>0.000</b>  | 5.29%  | 5.39%  | <b>0.005</b>  | 5.29%  | 5.30%  | <b>0.001</b>  |
| Platelet Aggregation Inhibitors | 1.46%  | 1.46%  | <b>0.000</b>  | 1.46%  | 1.47%  | <b>0.000</b>  | 1.46%  | 1.46%  | <b>0.000</b>  |
| Potassium Sparing Diuretic      | 4.00%  | 3.97%  | <b>-0.001</b> | 4.00%  | 4.03%  | <b>0.002</b>  | 4.00%  | 4.00%  | <b>0.000</b>  |
| Statin                          | 36.08% | 36.12% | <b>0.001</b>  | 36.08% | 36.48% | <b>0.008</b>  | 36.08% | 36.17% | <b>0.002</b>  |
| Thiazide                        | 36.23% | 36.22% | <b>0.000</b>  | 36.23% | 36.49% | <b>0.005</b>  | 36.23% | 36.27% | <b>0.001</b>  |



**eTable 6.** Standardized Differences (SD) – Second Cohort / Before Propensity Score Weighting

| Type of Drugs                                     | SGLT-2 | DPP-4  | SD            | SGLT-2 | GLP-1  | SD            | SGLT-2 | Other  | SD            |
|---------------------------------------------------|--------|--------|---------------|--------|--------|---------------|--------|--------|---------------|
| <b>Demographics</b>                               |        |        |               |        |        |               |        |        |               |
| Female, %                                         | 47.52% | 43.58% | <b>-0.079</b> | 47.52% | 61.36% | <b>0.281</b>  | 47.52% | 55.84% | <b>0.167</b>  |
| Mean age, years                                   | 53.44  | 54.43  | <b>0.118</b>  | 53.44  | 51.74  | <b>-0.187</b> | 53.44  | 51.25  | <b>-0.057</b> |
| Age 18 – 34 years, %                              | 2.76%  | 2.31%  | <b>-0.028</b> | 2.76%  | 5.33%  | <b>0.131</b>  | 2.76%  | 10.65% | <b>0.320</b>  |
| Age 35 - 44 years, %                              | 12.84% | 10.93% | <b>-0.059</b> | 12.84% | 17.16% | <b>0.121</b>  | 12.84% | 14.86% | <b>0.059</b>  |
| Age 45 - 54 years, %                              | 33.31% | 30.51% | <b>-0.060</b> | 33.31% | 32.51% | <b>-0.017</b> | 33.31% | 26.44% | <b>-0.151</b> |
| Age 55 - 64 years, %                              | 45.41% | 48.51% | <b>0.062</b>  | 45.41% | 39.91% | <b>-0.111</b> | 45.41% | 40.76% | <b>-0.094</b> |
| Age 65 or older years, %                          | 5.68%  | 7.74%  | <b>0.083</b>  | 5.68%  | 5.10%  | <b>-0.026</b> | 5.68%  | 7.28%  | <b>0.065</b>  |
| <b>Diabetes Severity</b>                          |        |        |               |        |        |               |        |        |               |
| Mean aDCSI score                                  | 0.12   | 0.14   | <b>0.040</b>  | 0.12   | 0.12   | <b>0.009</b>  | 0.12   | 0.08   | <b>-0.135</b> |
| aDCSI 0, %                                        | 90.78% | 90.10% | <b>-0.023</b> | 90.78% | 90.50% | <b>-0.009</b> | 90.78% | 93.88% | <b>0.117</b>  |
| aDCSI 1, %                                        | 7.02%  | 6.81%  | <b>-0.008</b> | 7.02%  | 7.26%  | <b>0.009</b>  | 7.02%  | 4.29%  | <b>-0.118</b> |
| aDCSI 2, %                                        | 1.95%  | 2.66%  | <b>0.047</b>  | 1.95%  | 1.92%  | <b>-0.002</b> | 1.95%  | 1.63%  | <b>-0.025</b> |
| aDCSI 3 or higher, %                              | 0.25%  | 0.43%  | <b>0.031</b>  | 0.25%  | 0.31%  | <b>0.012</b>  | 0.25%  | 0.20%  | <b>-0.011</b> |
| <b>Diagnosis-based Conditions in the baseline</b> |        |        |               |        |        |               |        |        |               |
| Cerebrovascular Disease                           | 1.60%  | 1.97%  | <b>0.028</b>  | 1.60%  | 1.57%  | <b>-0.003</b> | 1.60%  | 1.42%  | <b>-0.014</b> |
| Congestive Heart Failure                          | 3.77%  | 4.54%  | <b>0.038</b>  | 3.77%  | 4.02%  | <b>0.013</b>  | 3.77%  | 3.53%  | <b>-0.013</b> |
| Ischemic Heart Disease                            | 5.32%  | 6.07%  | <b>0.033</b>  | 5.32%  | 4.93%  | <b>-0.018</b> | 5.32%  | 4.11%  | <b>-0.057</b> |
| Hypertension                                      | 59.29% | 55.25% | <b>-0.082</b> | 59.29% | 51.34% | <b>-0.160</b> | 59.29% | 39.16% | <b>-0.411</b> |
| Retinopathy                                       | 4.34%  | 4.77%  | <b>0.020</b>  | 4.34%  | 3.95%  | <b>-0.020</b> | 4.34%  | 2.48%  | <b>-0.103</b> |
| Nephropathy                                       | 1.30%  | 2.73%  | <b>0.102</b>  | 1.30%  | 1.86%  | <b>0.044</b>  | 1.30%  | 1.12%  | <b>-0.016</b> |
| Neuropathy                                        | 1.76%  | 1.61%  | <b>-0.012</b> | 1.76%  | 1.73%  | <b>-0.002</b> | 1.76%  | 0.76%  | <b>-0.090</b> |
| Atrial fibrillation                               | 1.08%  | 1.21%  | <b>0.013</b>  | 1.08%  | 1.09%  | <b>0.001</b>  | 1.08%  | 0.95%  | <b>-0.013</b> |
| Renal Disease                                     | 1.50%  | 3.12%  | <b>0.108</b>  | 1.50%  | 2.05%  | <b>0.042</b>  | 1.50%  | 1.34%  | <b>-0.013</b> |
| Eye Disease                                       | 1.56%  | 1.60%  | <b>0.003</b>  | 1.56%  | 1.32%  | <b>-0.020</b> | 1.56%  | 0.70%  | <b>-0.082</b> |
| <b>Medications in the baseline</b>                |        |        |               |        |        |               |        |        |               |

|                                 |        |        |               |        |        |               |        |        |               |
|---------------------------------|--------|--------|---------------|--------|--------|---------------|--------|--------|---------------|
| ACE inhibitors                  | 37.29% | 36.66% | <b>-0.013</b> | 37.29% | 32.56% | <b>-0.099</b> | 37.29% | 27.12% | <b>-0.219</b> |
| Anticoagulants                  | 1.84%  | 1.98%  | <b>0.011</b>  | 1.84%  | 1.97%  | <b>0.010</b>  | 1.84%  | 1.76%  | <b>-0.006</b> |
| Angiotensin receptor blockers   | 22.70% | 22.04% | <b>-0.016</b> | 22.70% | 21.53% | <b>-0.028</b> | 22.70% | 14.49% | <b>-0.212</b> |
| Aspirin                         | 0.78%  | 0.91%  | <b>0.015</b>  | 0.78%  | 0.64%  | <b>-0.017</b> | 0.78%  | 0.46%  | <b>-0.040</b> |
| Asthma                          | 27.16% | 25.31% | <b>-0.042</b> | 27.16% | 30.52% | <b>0.074</b>  | 27.16% | 25.92% | <b>-0.028</b> |
| Bile Acid Sequestrants          | 1.21%  | 1.06%  | <b>-0.014</b> | 1.21%  | 1.27%  | <b>0.005</b>  | 1.21%  | 0.64%  | <b>-0.060</b> |
| Carbonic Anhydrase Inhibitors   | 0.06%  | 0.07%  | <b>0.002</b>  | 0.06%  | 0.14%  | <b>0.023</b>  | 0.06%  | 0.10%  | <b>0.011</b>  |
| Cardioselective Beta Blockers   | 12.58% | 13.20% | <b>0.019</b>  | 12.58% | 11.82% | <b>-0.023</b> | 12.58% | 11.62% | <b>-0.029</b> |
| Calcium Channel Blockers        | 16.89% | 17.17% | <b>0.007</b>  | 16.89% | 14.83% | <b>-0.057</b> | 16.89% | 13.10% | <b>-0.106</b> |
| Fibrates                        | 8.99%  | 8.87%  | <b>-0.004</b> | 8.99%  | 8.00%  | <b>-0.036</b> | 8.99%  | 5.55%  | <b>-0.133</b> |
| Hormone Replacement Therapy     | 8.02%  | 6.07%  | <b>-0.076</b> | 8.02%  | 11.81% | <b>0.127</b>  | 8.02%  | 9.63%  | <b>0.057</b>  |
| Loop Diuretic                   | 3.95%  | 3.85%  | <b>-0.005</b> | 3.95%  | 5.14%  | <b>0.057</b>  | 3.95%  | 3.04%  | <b>-0.049</b> |
| Niacin                          | 1.25%  | 1.23%  | <b>-0.001</b> | 1.25%  | 1.41%  | <b>0.015</b>  | 1.25%  | 1.48%  | <b>0.020</b>  |
| Beta-blockers                   | 5.11%  | 5.30%  | <b>0.009</b>  | 5.11%  | 5.53%  | <b>0.019</b>  | 5.11%  | 4.27%  | <b>-0.040</b> |
| Platelet Aggregation Inhibitors | 1.33%  | 1.49%  | <b>0.013</b>  | 1.33%  | 1.04%  | <b>-0.027</b> | 1.33%  | 0.78%  | <b>-0.054</b> |
| Potassium Sparing Diuretic      | 3.96%  | 3.82%  | <b>-0.007</b> | 3.96%  | 5.48%  | <b>0.072</b>  | 3.96%  | 4.40%  | <b>0.022</b>  |
| Statin                          | 35.88% | 33.78% | <b>-0.044</b> | 35.88% | 31.21% | <b>-0.099</b> | 35.88% | 21.54% | <b>-0.321</b> |
| Thiazide                        | 36.18% | 35.81% | <b>-0.008</b> | 36.18% | 35.29% | <b>-0.019</b> | 36.18% | 31.19% | <b>-0.106</b> |

**eTable 7.** Standardized Differences (SD) - Second Cohort / After Propensity Score Weighting

| Type of Drugs                                     | SGLT-2 | DPP-4  | SD            | SGLT-2 | GLP-1  | SD            | SGLT-2 | Other  | SD            |
|---------------------------------------------------|--------|--------|---------------|--------|--------|---------------|--------|--------|---------------|
| <b>Demographics</b>                               |        |        |               |        |        |               |        |        |               |
| Female, %                                         | 47.52% | 47.52% | <b>0.000</b>  | 47.52% | 47.32% | <b>-0.004</b> | 47.52% | 47.41% | <b>-0.002</b> |
| Mean age, years                                   | 53.44  | 53.43  | <b>-0.001</b> | 53.44  | 53.53  | <b>0.010</b>  | 53.44  | 53.50  | <b>0.002</b>  |
| Age 18 – 34 years, %                              | 2.76%  | 3.22%  | <b>0.027</b>  | 2.76%  | 2.98%  | <b>0.013</b>  | 2.76%  | 6.15%  | <b>0.165</b>  |
| Age 35 - 44 years, %                              | 12.84% | 13.02% | <b>0.005</b>  | 12.84% | 13.36% | <b>0.015</b>  | 12.84% | 11.62% | <b>-0.037</b> |
| Age 45 - 54 years, %                              | 33.31% | 32.22% | <b>-0.023</b> | 33.31% | 31.27% | <b>-0.044</b> | 33.31% | 26.67% | <b>-0.145</b> |
| Age 55 - 64 years, %                              | 45.41% | 44.99% | <b>-0.009</b> | 45.41% | 46.00% | <b>0.012</b>  | 45.41% | 46.68% | <b>0.025</b>  |
| Age 65 or older years, %                          | 5.68%  | 6.56%  | <b>0.037</b>  | 5.68%  | 6.40%  | <b>0.030</b>  | 5.68%  | 8.88%  | <b>0.124</b>  |
| <b>Diabetes Severity</b>                          |        |        |               |        |        |               |        |        |               |
| Mean aDCSI score                                  | 0.12   | 0.12   | <b>-0.001</b> | 0.12   | 0.12   | <b>0.005</b>  | 0.12   | 0.12   | <b>0.008</b>  |
| aDCSI 0, %                                        | 90.78% | 91.01% | <b>0.008</b>  | 90.78% | 90.56% | <b>-0.008</b> | 90.78% | 91.21% | <b>0.015</b>  |
| aDCSI 1, %                                        | 7.02%  | 6.64%  | <b>-0.015</b> | 7.02%  | 7.27%  | <b>0.010</b>  | 7.02%  | 6.20%  | <b>-0.033</b> |
| aDCSI 2, %                                        | 1.95%  | 2.06%  | <b>0.008</b>  | 1.95%  | 1.90%  | <b>-0.004</b> | 1.95%  | 2.25%  | <b>0.021</b>  |
| aDCSI 3 or higher, %                              | 0.25%  | 0.29%  | <b>0.007</b>  | 0.25%  | 0.27%  | <b>0.005</b>  | 0.25%  | 0.34%  | <b>0.017</b>  |
| <b>Diagnosis-based Conditions in the baseline</b> |        |        |               |        |        |               |        |        |               |
| Cerebrovascular Disease                           | 1.60%  | 1.59%  | <b>0.000</b>  | 1.60%  | 1.61%  | <b>0.001</b>  | 1.60%  | 1.61%  | <b>0.001</b>  |
| Congestive Heart Failure                          | 3.77%  | 3.76%  | <b>0.000</b>  | 3.77%  | 3.81%  | <b>0.002</b>  | 3.77%  | 3.78%  | <b>0.001</b>  |
| Ischemic Heart Disease                            | 5.32%  | 5.32%  | <b>0.000</b>  | 5.32%  | 5.34%  | <b>0.001</b>  | 5.32%  | 5.34%  | <b>0.001</b>  |
| Hypertension                                      | 59.29% | 59.32% | <b>0.001</b>  | 59.29% | 59.62% | <b>0.007</b>  | 59.29% | 59.37% | <b>0.002</b>  |
| Retinopathy                                       | 4.34%  | 4.34%  | <b>0.000</b>  | 4.34%  | 4.39%  | <b>0.002</b>  | 4.34%  | 4.38%  | <b>0.002</b>  |
| Nephropathy                                       | 1.30%  | 1.30%  | <b>0.000</b>  | 1.30%  | 1.34%  | <b>0.003</b>  | 1.30%  | 1.32%  | <b>0.001</b>  |
| Neuropathy                                        | 1.76%  | 1.76%  | <b>0.000</b>  | 1.76%  | 1.79%  | <b>0.003</b>  | 1.76%  | 1.78%  | <b>0.002</b>  |
| Atrial fibrillation                               | 1.08%  | 1.08%  | <b>0.000</b>  | 1.08%  | 1.07%  | <b>-0.001</b> | 1.08%  | 1.08%  | <b>0.000</b>  |
| Renal Disease                                     | 1.50%  | 1.50%  | <b>0.000</b>  | 1.50%  | 1.53%  | <b>0.003</b>  | 1.50%  | 1.51%  | <b>0.001</b>  |
| Eye Disease                                       | 1.56%  | 1.55%  | <b>-0.001</b> | 1.56%  | 1.58%  | <b>0.002</b>  | 1.56%  | 1.57%  | <b>0.001</b>  |
| <b>Medications in the baseline</b>                |        |        |               |        |        |               |        |        |               |

|                                 |        |        |               |        |        |               |        |        |               |
|---------------------------------|--------|--------|---------------|--------|--------|---------------|--------|--------|---------------|
| ACE inhibitors                  | 37.29% | 37.32% | <b>0.001</b>  | 37.29% | 37.63% | <b>0.007</b>  | 37.29% | 37.36% | <b>0.001</b>  |
| Anticoagulants                  | 1.84%  | 1.84%  | <b>0.000</b>  | 1.84%  | 1.85%  | <b>0.001</b>  | 1.84%  | 1.84%  | <b>0.000</b>  |
| Angiotensin receptor blockers   | 22.70% | 22.73% | <b>0.001</b>  | 22.70% | 22.84% | <b>0.003</b>  | 22.70% | 22.76% | <b>0.001</b>  |
| Aspirin                         | 0.78%  | 0.78%  | <b>0.000</b>  | 0.78%  | 0.77%  | <b>0.000</b>  | 0.78%  | 0.78%  | <b>0.000</b>  |
| Asthma                          | 27.16% | 27.19% | <b>0.001</b>  | 27.16% | 27.09% | <b>-0.002</b> | 27.16% | 27.21% | <b>0.001</b>  |
| Bile Acid Sequestrants          | 1.21%  | 1.22%  | <b>0.001</b>  | 1.21%  | 1.24%  | <b>0.002</b>  | 1.21%  | 1.22%  | <b>0.001</b>  |
| Carbonic Anhydrase Inhibitors   | 0.06%  | 0.07%  | <b>0.000</b>  | 0.06%  | 0.06%  | <b>0.000</b>  | 0.06%  | 0.07%  | <b>0.001</b>  |
| Cardioselective Beta Blockers   | 12.58% | 12.58% | <b>0.000</b>  | 12.58% | 12.71% | <b>0.004</b>  | 12.58% | 12.60% | <b>0.001</b>  |
| Calcium Channel Blockers        | 16.89% | 16.90% | <b>0.000</b>  | 16.89% | 17.05% | <b>0.004</b>  | 16.89% | 16.90% | <b>0.000</b>  |
| Fibrates                        | 8.99%  | 9.02%  | <b>0.001</b>  | 8.99%  | 9.11%  | <b>0.004</b>  | 8.99%  | 9.05%  | <b>0.002</b>  |
| Hormone Replacement Therapy     | 8.02%  | 8.07%  | <b>0.002</b>  | 8.02%  | 8.03%  | <b>0.000</b>  | 8.02%  | 7.98%  | <b>-0.001</b> |
| Loop Diuretic                   | 3.95%  | 3.92%  | <b>-0.002</b> | 3.95%  | 4.03%  | <b>0.005</b>  | 3.95%  | 3.97%  | <b>0.001</b>  |
| Niacin                          | 1.25%  | 1.25%  | <b>0.000</b>  | 1.25%  | 1.26%  | <b>0.001</b>  | 1.25%  | 1.25%  | <b>0.000</b>  |
| Beta-blockers                   | 5.11%  | 5.10%  | <b>-0.001</b> | 5.11%  | 5.21%  | <b>0.005</b>  | 5.11%  | 5.13%  | <b>0.001</b>  |
| Platelet Aggregation Inhibitors | 1.33%  | 1.33%  | <b>0.000</b>  | 1.33%  | 1.34%  | <b>0.001</b>  | 1.33%  | 1.34%  | <b>0.000</b>  |
| Potassium Sparing Diuretic      | 3.96%  | 3.94%  | <b>-0.001</b> | 3.96%  | 3.98%  | <b>0.001</b>  | 3.96%  | 3.97%  | <b>0.000</b>  |
| Statin                          | 35.88% | 35.92% | <b>0.001</b>  | 35.88% | 36.31% | <b>0.009</b>  | 35.88% | 35.97% | <b>0.002</b>  |
| Thiazide                        | 36.18% | 36.18% | <b>0.000</b>  | 36.18% | 36.43% | <b>0.005</b>  | 36.18% | 36.22% | <b>0.001</b>  |

**eTable 8.** Variables With the Proportional Hazard Assumption Violation for Each Outcome and the Comparison Drug (Relative to SGLT-2)

| Outcome Studied                                   | Amputation |       |       | Ulcer |       |       | Osteomyelitis |       |       |
|---------------------------------------------------|------------|-------|-------|-------|-------|-------|---------------|-------|-------|
|                                                   | DPP-4      | GLP-1 | other | DPP-4 | GLP-1 | other | DPP-4         | GLP-1 | other |
| <b>Demographics</b>                               |            |       |       |       |       |       |               |       |       |
| Female                                            |            |       | x     | x     |       | x     |               |       |       |
| Age Groups                                        | x          |       |       |       |       |       | x             | x     |       |
| <b>Diabetes Severity</b>                          |            |       |       |       |       |       |               |       |       |
| aDCSI Groups                                      |            |       |       |       |       |       |               |       |       |
| <b>Diagnosis-based Conditions in the baseline</b> |            |       |       |       |       |       |               |       |       |
| Cerebrovascular Disease                           |            |       |       |       |       |       |               |       |       |
| Congestive Heart Failure                          |            |       |       |       | x     |       |               |       |       |
| Ischemic Heart Disease                            |            |       |       |       | x     |       |               |       |       |
| Hypertension                                      |            |       |       |       |       |       |               | x     |       |
| Retinopathy                                       |            |       |       |       |       |       |               |       |       |
| Nephropathy                                       |            | x     |       |       |       |       |               |       |       |
| Neuropathy                                        |            |       |       |       |       |       |               |       |       |
| Atrial fibrillation                               |            |       |       |       |       |       |               |       |       |
| Renal Disease                                     |            |       |       |       |       |       |               |       |       |
| Eye Disease                                       |            |       |       |       |       |       |               |       |       |
| <b>Medications</b>                                |            |       |       |       |       |       |               |       |       |
| ACE inhibitors                                    |            |       |       |       |       | x     |               |       |       |
| Anticoagulants                                    |            |       |       |       |       |       |               |       |       |
| Angiotensin receptor blockers                     |            |       |       |       |       |       |               |       | x     |
| Aspirin                                           |            |       |       |       |       |       |               |       |       |
| Asthma                                            |            |       |       | x     |       | x     |               |       |       |
| Bile Acid Sequestrants                            |            |       |       |       |       |       |               |       |       |
| Carbonic Anhydrase Inhibitors                     | x          | x     |       | x     | x     |       | x             | x     |       |

|                                 |   |   |  |   |   |   |  |   |  |
|---------------------------------|---|---|--|---|---|---|--|---|--|
| Cardioselective Beta Blockers   |   |   |  |   |   | × |  |   |  |
| Calcium Channel Blockers        | × |   |  |   |   |   |  |   |  |
| Fibrates                        |   | × |  |   |   |   |  |   |  |
| Hormone Replacement Therapy     |   |   |  |   |   |   |  |   |  |
| Loop Diuretic                   |   |   |  |   |   |   |  |   |  |
| Niacin                          | × | × |  | × |   |   |  | × |  |
| Beta-blockers                   |   |   |  |   |   |   |  |   |  |
| Platelet Aggregation Inhibitors |   |   |  |   |   |   |  |   |  |
| Potassium Sparing Diuretic      |   |   |  |   | × |   |  |   |  |
| Statin                          |   |   |  |   |   | × |  |   |  |
| Thiazide                        |   |   |  |   |   | × |  |   |  |

×: represents violation and hence was included in the model as a stratifying factor

**eTable 8 (CON'T).**

| Outcome Studied                                   | Peripheral Vascular Disease |       |       | Critical Limb Ischemia |       |       |
|---------------------------------------------------|-----------------------------|-------|-------|------------------------|-------|-------|
|                                                   | DPP-4                       | GLP-1 | other | DPP-4                  | GLP-1 | other |
| <b>Demographics</b>                               |                             |       |       |                        |       |       |
| Female                                            |                             |       | ×     |                        |       | ×     |
| Age Groups                                        |                             | ×     | ×     |                        | ×     | ×     |
| <b>Diabetes Severity</b>                          |                             |       |       |                        |       |       |
| aDCSI Groups                                      |                             |       | ×     | ×                      |       |       |
| <b>Diagnosis-based Conditions in the baseline</b> |                             |       |       |                        |       |       |
| Cerebrovascular Disease                           |                             |       | ×     |                        |       |       |
| Congestive Heart Failure                          |                             |       |       | ×                      |       |       |
| Ischemic Heart Disease                            |                             |       |       | ×                      |       |       |
| Hypertension                                      |                             |       | ×     | ×                      |       |       |
| Retinopathy                                       |                             |       |       |                        |       |       |
| Nephropathy                                       |                             |       |       |                        |       |       |
| Neuropathy                                        |                             |       | ×     |                        |       |       |
| Atrial fibrillation                               |                             |       |       | ×                      |       |       |
| Renal Disease                                     |                             |       |       |                        |       |       |
| Eye Disease                                       |                             |       |       | ×                      |       |       |
| <b>Medications</b>                                |                             |       |       |                        |       |       |
| ACE inhibitors                                    |                             |       | ×     |                        |       | ×     |
| Anticoagulants                                    |                             |       |       | ×                      |       |       |
| Angiotensin receptor blockers                     |                             |       |       | ×                      | ×     |       |
| Aspirin                                           |                             |       |       |                        |       |       |
| Asthma                                            |                             | ×     | ×     |                        |       | ×     |
| Bile Acid Sequestrants                            |                             |       |       |                        |       |       |
| Carbonic Anhydrase Inhibitors                     |                             |       |       |                        |       |       |
| Cardioselective Beta Blockers                     |                             |       |       |                        |       | ×     |

|                                 |   |   |   |  |   |   |
|---------------------------------|---|---|---|--|---|---|
| Calcium Channel Blockers        |   |   |   |  |   | × |
| Fibrates                        |   |   | × |  |   | × |
| Hormone Replacement Therapy     | × | × | × |  |   |   |
| Loop Diuretic                   |   |   |   |  |   |   |
| Niacin                          |   |   | × |  |   | × |
| Beta-blockers                   |   |   | × |  | × | × |
| Platelet Aggregation Inhibitors | × |   |   |  |   |   |
| Potassium Sparing Diuretic      |   |   |   |  |   |   |
| Statin                          | × |   | × |  |   | × |
| Thiazide                        | × |   | × |  |   | × |

×: represents violation and hence was included in the model as a stratifying factor



**eTable 9.** Characteristics of the Study Sample - the Second Cohort

|                                        | SGLT2      | DPP4        | GLP1       | Other <sup>1</sup> |
|----------------------------------------|------------|-------------|------------|--------------------|
|                                        | (N=38,692) | (N=101,408) | (N=37,932) | (N=755,041)        |
| Demographic characteristics            |            |             |            |                    |
| Female**, %                            | 47.52      | 43.58       | 61.36      | 55.84              |
| Mean age**, years                      | 53.44      | 54.43       | 51.74      | 51.25              |
| Age 18 – 34 years**, %                 | 2.76       | 2.31        | 5.33       | 10.65              |
| Age 35 - 44 years**, %                 | 12.84      | 10.93       | 17.16      | 14.86              |
| Age 45 - 54 years**, %                 | 33.31      | 30.51       | 32.51      | 26.44              |
| Age 55 - 64 years**, %                 | 45.41      | 48.51       | 39.91      | 40.76              |
| Age 65 or older years**, %             | 5.68       | 7.74        | 5.10       | 7.28               |
| Mean adapted diabetes severity index** | 0.12       | 0.14        | 0.12       | 0.08               |
| aDCSI 0**, %                           | 90.78      | 90.10       | 90.50      | 93.88              |
| aDCSI 1**, %                           | 7.02       | 6.81        | 7.26       | 4.29               |
| aDCSI 2**, %                           | 1.95       | 2.66        | 1.92       | 1.63               |
| aDCSI 3 or higher**, %                 | 0.25       | 0.43        | 0.31       | 0.20               |
| Baseline comorbidities, %              |            |             |            |                    |
| Cerebrovascular Disease**              | 1.60       | 1.97        | 1.57       | 1.42               |
| Congestive Heart Failure**             | 3.77       | 4.54        | 4.02       | 3.53               |
| Ischemic Heart Disease**               | 5.32       | 6.07        | 4.93       | 4.11               |
| Hypertension**                         | 59.29      | 55.25       | 51.34      | 39.16              |
| Retinopathy**                          | 4.34       | 4.77        | 3.95       | 2.48               |
| Nephropathy**                          | 1.30       | 2.73        | 1.86       | 1.12               |
| Neuropathy**                           | 1.76       | 1.61        | 1.73       | 0.76               |
| Atrial fibrillation**                  | 1.08       | 1.21        | 1.09       | 0.95               |
| Renal Disease**                        | 1.50       | 3.12        | 2.05       | 1.34               |
| Eye Disease**                          | 1.56       | 1.60        | 1.32       | 0.70               |
| Baseline medications, %                |            |             |            |                    |
| ACE inhibitors**                       | 37.29      | 36.66       | 32.56      | 27.12              |
| Anticoagulants**                       | 1.84       | 1.98        | 1.97       | 1.76               |
| Angiotensin receptor blockers**        | 22.70      | 22.04       | 21.53      | 14.49              |
| Aspirin**                              | 0.7        | 0.91        | 0.64       | 0.46               |
| Asthma**                               | 27.16      | 25.31       | 30.52      | 25.92              |
| Bile Acid Sequestrants**               | 1.21       | 1.06        | 1.27       | 0.64               |
| Carbonic Anhydrase Inhibitors**        | 0.06       | 0.07        | 0.14       | 0.10               |
| Cardioselective Beta Blockers**        | 12.58      | 13.20       | 11.82      | 11.62              |

|                                   |       |       |       |       |
|-----------------------------------|-------|-------|-------|-------|
| Calcium Channel Blockers**        | 16.89 | 17.17 | 14.83 | 13.10 |
| Fibrates**                        | 8.99  | 8.87  | 8.00  | 5.55  |
| Hormone Replacement Therapy**     | 8.02  | 6.07  | 11.81 | 9.63  |
| Loop Diuretic**                   | 3.95  | 3.85  | 5.14  | 3.04  |
| Niacin**                          | 1.25  | 1.23  | 1.41  | 1.48  |
| Beta-blockers**                   | 5.11  | 5.30  | 5.53  | 4.27  |
| Platelet Aggregation Inhibitors** | 1.33  | 1.49  | 1.04  | 0.78  |
| Potassium Sparing Diuretic**      | 3.96  | 3.82  | 5.48  | 4.40  |
| Statin**                          | 35.88 | 33.78 | 31.21 | 21.54 |
| Thiazide**                        | 36.18 | 35.81 | 35.29 | 31.19 |

<sup>1</sup> Includes any combination of metformin, sulfonylureas and glitazones

\* p<0.05; \*\* p<0.01

**eTable 10.** Adjusted Association Between SGLT2 Use, Amputation and Other Vascular Outcomes – Different Methods of Control Variables Inclusion (Regression Covariates With and Without ATT Weighting)

|                                    | <b>First Cohort (Excluding amputation during baseline)</b>   |                               |                                         |
|------------------------------------|--------------------------------------------------------------|-------------------------------|-----------------------------------------|
|                                    | DPP4 inhibitors<br>(N=144,892)                               | GLP1 inhibitors<br>(N=78,989) | Other Drugs <sup>1</sup><br>(N=809,763) |
| Amputation                         |                                                              |                               |                                         |
| Adjusted Hazard Ratio <sup>2</sup> | 1.46 (0.83-2.57)                                             | 1.36 (0.62-3.00)              | 1.85* (1.14-3.00)                       |
| Adjusted Hazard Ratio <sup>3</sup> | 1.50 (0.84-2.67)                                             | 1.47 (0.64-3.36)              | 2.12* (1.19-3.78)                       |
|                                    | <b>Second Cohort (Excluding any outcome during baseline)</b> |                               |                                         |
|                                    | DPP4 inhibitors<br>(N=140,100)                               | GLP1 inhibitors<br>(N=76,624) | Other Drugs <sup>1</sup><br>(N=793,733) |
| Ulcer                              |                                                              |                               |                                         |
| Adjusted Hazard Ratio <sup>2</sup> | 1.12 (0.91-1.39)                                             | 0.96 (0.74-1.24)              | 1.29** (1.07-1.54)                      |
| Adjusted Hazard Ratio <sup>3</sup> | 1.12 (0.91-1.38)                                             | 0.97 (0.75-1.26)              | 1.32** (1.09-1.60)                      |
| Osteomyelitis                      |                                                              |                               |                                         |
| Adjusted Hazard Ratio <sup>2</sup> | 1.47 (0.99-2.18)                                             | 1.59 (0.92-2.78)              | 1.35 (0.97-1.89)                        |
| Adjusted Hazard Ratio <sup>3</sup> | 1.48 (0.99-2.20)                                             | 1.53 (0.87-2.70)              | 1.44* (1.02-2.05)                       |
| Peripheral Vascular Disease        |                                                              |                               |                                         |
| Adjusted Hazard Ratio <sup>2</sup> | 0.87** (0.79-0.96)                                           | 0.95 (0.84-1.08)              | 1.13** (1.03-1.23)                      |
| Adjusted Hazard Ratio <sup>3</sup> | 0.87** (0.79-0.96)                                           | 0.95 (0.84-1.07)              | 1.11* (1.03-1.23)                       |
| Critical Limb Ischemia             |                                                              |                               |                                         |
| Adjusted Hazard Ratio <sup>2</sup> | 0.75** (0.64-0.88)                                           | 0.80* (0.65-0.97)             | 1.00 (0.86-1.16)                        |

|                                    |                    |                   |                  |
|------------------------------------|--------------------|-------------------|------------------|
| Adjusted Hazard Ratio <sup>3</sup> | 0.76** (0.65-0.89) | 0.79* (0.65-0.97) | 0.99 (0.85-1.15) |
|------------------------------------|--------------------|-------------------|------------------|

<sup>1</sup> Includes any combination of metformin, sulfonylureas and glitazones

<sup>2</sup> All control variables as regression covariates only

<sup>3</sup> All control variables as regression covariates with propensity score weighting

\* p<0.05; \*\* p<0.0

**eTable 11.** Adjusted Association Between SGLT2 Use, Amputation and Other Vascular Outcomes After Combining DPP4 Inhibitors and GLP1 Agonists as Single Reference Group

|                                      | Reference Group<br>DPP4 Inhibitors + GLP1 Agonists |
|--------------------------------------|----------------------------------------------------|
| Amputation (N: 184,012)              |                                                    |
| Crude Hazard Ratio <sup>1</sup>      | 1.49 (0.86-2.60)                                   |
| Adjusted Hazard Ratio <sup>2</sup>   | 1.51 (0.86-2.63)                                   |
| Other Vascular Outcomes (N: 178,032) |                                                    |
| Ulcer                                |                                                    |
| Crude Hazard Ratio <sup>1</sup>      | 1.09 (0.89-1.33)                                   |
| Adjusted Hazard Ratio <sup>2</sup>   | 1.10 (0.90-1.34)                                   |
| Osteomyelitis                        |                                                    |
| Crude Hazard Ratio <sup>1</sup>      | 1.53* (1.04-2.24)                                  |
| Adjusted Hazard Ratio <sup>2</sup>   | 1.51* (1.03-2.22)                                  |
| Peripheral Vascular Disease          |                                                    |
| Crude Hazard Ratio <sup>1</sup>      | 0.88** (0.80-0.97)                                 |
| Adjusted Hazard Ratio <sup>2</sup>   | 0.89* (0.81-0.98)                                  |
| Critical Limb Ischemia               |                                                    |
| Crude Hazard Ratio <sup>1</sup>      | 0.75** (0.65-0.88)                                 |
| Adjusted Hazard Ratio <sup>2</sup>   | 0.76** (0.65-0.89)                                 |

<sup>1</sup> With propensity score weighting only

<sup>2</sup> With propensity score weighting and covariates as regressors and stratifiers  
\*  $p < 0.05$ ; \*\*  $p < 0.01$

**eTable 12.** Adjusted Association Between SGLT2 Use, Amputation and Other Vascular Outcomes Accounting for Use of Sulfonylureas, Metformin and TZDs During Baseline Period

|                                    | <b>First Cohort (Excluding amputation during baseline)</b>   |                               |                                         |
|------------------------------------|--------------------------------------------------------------|-------------------------------|-----------------------------------------|
|                                    | DPP4 inhibitors<br>(N=144,892)                               | GLP1 inhibitors<br>(N=78,989) | Other Drugs <sup>1</sup><br>(N=809,763) |
| Adjusted Hazard Ratio <sup>2</sup> | 1.46 (0.83-2.57)                                             | 1.36 (0.62-3.00)              | 1.85* (1.14-3.00)                       |
| Adjusted Hazard Ratio <sup>3</sup> | 1.50 (0.84-2.69)                                             | 1.35 (0.62-2.92)              | 1.69* (1.02-2.80)                       |
|                                    | <b>Second Cohort (Excluding any outcome during baseline)</b> |                               |                                         |
|                                    | DPP4 inhibitors<br>(N=140,100)                               | GLP1 inhibitors<br>(N=76,624) | Other Drugs <sup>1</sup><br>(N=793,733) |
| Ulcer                              |                                                              |                               |                                         |
| Adjusted Hazard Ratio <sup>2</sup> | 1.12 (0.91-1.39)                                             | 0.96 (0.74-1.24)              | 1.29** (1.07-1.54)                      |
| Adjusted Hazard Ratio <sup>3</sup> | 1.10 (0.89-1.35)                                             | 0.94 (0.73-1.22)              | 1.19 (0.99-1.43)                        |
| Osteomyelitis                      |                                                              |                               |                                         |
| Adjusted Hazard Ratio <sup>2</sup> | 1.47 (0.99-2.18)                                             | 1.59 (0.92-2.78)              | 1.35 (0.97-1.89)                        |
| Adjusted Hazard Ratio <sup>3</sup> | 1.49 (0.99-2.22)                                             | 1.58 (0.91-2.75)              | 1.30 (0.93-1.82)                        |
| Peripheral Vascular Disease        |                                                              |                               |                                         |
| Adjusted Hazard Ratio <sup>2</sup> | 0.87** (0.79-0.96)                                           | 0.95 (0.84-1.08)              | 1.13** (1.03-1.23)                      |
| Adjusted Hazard Ratio <sup>3</sup> | 0.87** (0.79-0.96)                                           | 0.95 (0.84-1.07)              | 1.16** (1.06-1.27)                      |
| Critical Limb Ischemia             |                                                              |                               |                                         |

|                                    |                    |                   |                  |
|------------------------------------|--------------------|-------------------|------------------|
| Adjusted Hazard Ratio <sup>2</sup> | 0.75** (0.64-0.88) | 0.80* (0.65-0.97) | 1.00 (0.86-1.16) |
| Adjusted Hazard Ratio <sup>3</sup> | 0.76** (0.65-0.90) | 0.79* (0.65-0.97) | 1.01 (0.87-1.17) |

<sup>1</sup> Includes any combination of metformin, sulfonylureas and glitazones

<sup>2</sup> All control variables (**without** three indicators of older agents use) as regression covariates only

<sup>3</sup> All control variables (**with** three indicators of older agents use) as regression covariates only

\* p<0.05; \*\* p<0.01



**eTable 13.** Adjusted Association Between SGLT2 Use and Amputation – Including Patients With Amputation in The Baseline

|                                    | DPP4 inhibitors<br>(N=144,985) | GLP1 inhibitors<br>(N=79,027) | Other Drugs <sup>1</sup><br>(N=810,101) |
|------------------------------------|--------------------------------|-------------------------------|-----------------------------------------|
| Adjusted Hazard Ratio <sup>2</sup> | 1.69 (0.99-2.90)               | 1.43 (0.68-3.00)              | 1.91** (1.21-3.00)                      |
| Adjusted Hazard Ratio <sup>3</sup> | 1.73* (1.01-2.98)              | 1.53 (0.70-3.34)              | 2.19** (1.27-3.77)                      |

<sup>1</sup> Includes any combination of metformin, sulfonylureas and glitazones.

<sup>2</sup> With covariates as regressors and stratifiers.

<sup>3</sup> With propensity score weighting and covariates as regressors and stratifiers.

\* p<0.05; \*\* p<0.0
